# Supplementary material for: NADPH Oxidases: The Vital Performers and Center Hubs during Plant Growth and Signaling
Source: PubMed Central journal article supplement (PMC7072856; doi:10.3390/cells9020437), 2020-02-13
Supplement: cells-09-00437-s001.pdf [file cells-09-00437-s001.pdf]

**Title:** NADPH oxidases: the Vital Performers and Center Hubs during Plant Growth and Signaling

Chun-Hong Hu <sup>1,2,†</sup>, Peng-Qi Wang <sup>3,†</sup>, Peng-Peng Zhang <sup>1</sup>, Xiu-Min Nie <sup>1</sup>, Bin-Bin Li <sup>1</sup>, Li Tai <sup>1</sup>, Wen-Ting Liu <sup>1</sup>, Wen-Qiang Li <sup>1</sup> and Kun-Ming Chen <sup>1,\*</sup>

<sup>1</sup> State Key Laboratory of Crop Stress Biology in Arid Areas, College of Life Sciences, Northwest A&F University, Yangling 712100, Shaanxi, China; ourcarrot@163.com (C.-H.H.); 15256849763@163.com (P.-P.Z.); niexiumin1019@163.com (X.-M.N.); libinbin@nwsuaf.edu.cn (B.-B.L.); 15591861258@163.com (L.T.); lwt001975@163.com (W.-T.L.); wqli@nwsuaf.edu.cn (W.-Q.L.)

<sup>2</sup> College of Life Science and Agronomy, Zhoukou Normal University, Zhoukou 466000, Henan, China

<sup>3</sup> School of Life Sciences, Tsinghua University, Beijing 100084, China; wpq19@mails.tsinghua.edu.cn

<sup>†</sup> These authors contributed equally to this work.

<sup>\*</sup> Correspondence: kunmingchen@nwsuaf.edu.cn or kunmingchen@163.com.cn; Tel.: +86-29-8703-1358; Fax: +86-29-8709-2262.

1 **1. Supplementary Tables**

2

3

**Table S1. The detailed information about the members of NADPH oxidases (NOXs/RBOHs) gene family in plants**

| Name                        | Accession No.       | AA. | Tissue specificity and function                                                                                                                                                                                                                                                                                                                                                                                                                                                                                                                                                                                                                                                                                                                                                                                                          | Regulation                                                                                                                                                                                                                                                  | References                                                                                                                                                                                                                                                                                                                                                                                                                                |
|-----------------------------|---------------------|-----|------------------------------------------------------------------------------------------------------------------------------------------------------------------------------------------------------------------------------------------------------------------------------------------------------------------------------------------------------------------------------------------------------------------------------------------------------------------------------------------------------------------------------------------------------------------------------------------------------------------------------------------------------------------------------------------------------------------------------------------------------------------------------------------------------------------------------------------|-------------------------------------------------------------------------------------------------------------------------------------------------------------------------------------------------------------------------------------------------------------|-------------------------------------------------------------------------------------------------------------------------------------------------------------------------------------------------------------------------------------------------------------------------------------------------------------------------------------------------------------------------------------------------------------------------------------------|
| <i>Arabidopsis thaliana</i> |                     |     |                                                                                                                                                                                                                                                                                                                                                                                                                                                                                                                                                                                                                                                                                                                                                                                                                                          |                                                                                                                                                                                                                                                             |                                                                                                                                                                                                                                                                                                                                                                                                                                           |
| <i>AtRbohA</i>              | O81209 <sup>R</sup> | 902 | Expression in root                                                                                                                                                                                                                                                                                                                                                                                                                                                                                                                                                                                                                                                                                                                                                                                                                       | Unknown                                                                                                                                                                                                                                                     | (Sagi and Fluhr, 2006)                                                                                                                                                                                                                                                                                                                                                                                                                    |
| <i>AtRbohB</i>              | Q9SBI0 <sup>R</sup> | 843 | Expression in germinating seeds.<br>Function: seed germination and endosperm weakening                                                                                                                                                                                                                                                                                                                                                                                                                                                                                                                                                                                                                                                                                                                                                   | ABA signaling; Post-translational protein modifications                                                                                                                                                                                                     | (Muller et al., 2009)                                                                                                                                                                                                                                                                                                                                                                                                                     |
| <i>AtRbohC</i>              | O81210 <sup>R</sup> | 905 | Expression in root.<br>Function: root hair growth; uptake and translocation of Cd; antioxidant defenses; transport and translocation of As and macro/micronutrients                                                                                                                                                                                                                                                                                                                                                                                                                                                                                                                                                                                                                                                                      | ROP GTPases; Ca <sup>2+</sup>                                                                                                                                                                                                                               | (Foreman et al., 2003)<br>(Jones et al., 2007)                                                                                                                                                                                                                                                                                                                                                                                            |
|                             |                     |     |                                                                                                                                                                                                                                                                                                                                                                                                                                                                                                                                                                                                                                                                                                                                                                                                                                          | Unknown                                                                                                                                                                                                                                                     | (Gupta et al., 2017)                                                                                                                                                                                                                                                                                                                                                                                                                      |
|                             |                     |     |                                                                                                                                                                                                                                                                                                                                                                                                                                                                                                                                                                                                                                                                                                                                                                                                                                          | Unknown                                                                                                                                                                                                                                                     | (Gupta et al., 2013)                                                                                                                                                                                                                                                                                                                                                                                                                      |
| <i>AtRbohD</i>              | Q9FIJ0 <sup>R</sup> | 921 | Expression in whole plant.<br>Function: root development; immune response to fungus; involving in complex with EFR and FLS2; Initiation or prevention of cell death dependent on the distance from pathogen attack; trigger death in infection-damaged cells; inhibits death in neighboring cells; stimulate autophagosome formation and limited hypersensitive (HR) cell death; rapid closure of leaf stomata and enhance resistance to bacterial pathogen; rapid defense response activation improving salt tolerance by regulating Na <sup>+</sup> /K <sup>+</sup> homeostasis and increase proline accumulation; mediate long-distance cell-to-cell communication; regulateing rapid systemic acquired acclimation (SAA) and systemic response to wound stimulus; abiotic stresses; hypoxia response; uptake and translocation of Cd | ABA;<br>Ca <sup>2+</sup> ;<br>Auxin independent;<br>Pathogen- associated molecular patterns;<br>Salicylic acid;<br>Ethylene;<br>BIK1;<br>SA;<br>Purinergic signaling<br>CPK5;<br>Ethylene;<br>Hypoxia signaling;<br>H <sub>2</sub> O <sub>2</sub> signaling | (Jiao et al., 2013)<br>(Li et al., 2015a)<br>(Morales et al., 2016)<br>(Foley et al., 2013)<br>(Pogany et al., 2009)<br>(Kadota et al., 2014)<br>(Liu et al., 2015)<br>(Chen et al., 2017)<br>(Dubielia et al., 2013)<br>(Ma et al., 2012)<br>(Deinlein et al., 2014)<br>(Ben Rejeb et al., 2015a)<br>(Ben Rejeb et al., 2015b)<br>(Miller et al., 2009)<br>(Mittler and Blumwald, 2015)<br>(Yang and Hong, 2015)<br>(Gupta et al., 2017) |
| <i>AtRbohE</i>              | O81211 <sup>R</sup> | 952 | Expression in stamens, tapetum.<br>Function: pollen development                                                                                                                                                                                                                                                                                                                                                                                                                                                                                                                                                                                                                                                                                                                                                                          | Tapetal transcriptional network                                                                                                                                                                                                                             | (Xie et al., 2014)                                                                                                                                                                                                                                                                                                                                                                                                                        |

4

5 **Table S1 Continued**

| Name                            | Accession No.                                 | AA. | Tissue specificity and function                                                                                                                                                                                                                                                                                                                                                                                | Regulation                                                                                                                                                                                         | References                                                                                                                                                                                                                                                                                                         |
|---------------------------------|-----------------------------------------------|-----|----------------------------------------------------------------------------------------------------------------------------------------------------------------------------------------------------------------------------------------------------------------------------------------------------------------------------------------------------------------------------------------------------------------|----------------------------------------------------------------------------------------------------------------------------------------------------------------------------------------------------|--------------------------------------------------------------------------------------------------------------------------------------------------------------------------------------------------------------------------------------------------------------------------------------------------------------------|
| <i>AtRbohF</i>                  | O48538 <sup>R</sup>                           | 944 | Expression in whole plant.<br>Function: root development; immune response to fungus; HR-related cell death; metabolomic responses and resistance; improving salt tolerance by regulating Na <sup>+</sup> /K <sup>+</sup> homeostasis and increase proline accumulation; protect leaves from salinity stress by regulating xylem's loading of Na <sup>+</sup> ; uptake and translocation of Cd; cold responses. | Ca <sup>2+</sup> ; Auxin independent;<br>Pathogen- associated molecular patterns;<br>Ethylene;<br>Na <sup>+</sup> accumulation; [Ca <sup>2+</sup> ] <sub>cyt</sub> elevation;<br>Binding to AtSRC2 | (Foreman et al., 2003)<br>(Jones et al., 2007)<br>(Morales et al., 2016)<br>(Foley et al., 2013)<br>(Chaouch et al., 2012)<br>(Ma et al., 2012)<br>(Deinlein et al., 2014)<br>(Ben Rejeb et al., 2015a)<br>(Ben Rejeb et al., 2015b)<br>(Kurusu et al., 2015)<br>(Gupta et al., 2017)<br>(Kawarazaki et al., 2013) |
| <i>AtRbohG</i>                  | Q9SW17 <sup>R</sup>                           | 849 | Expression in root                                                                                                                                                                                                                                                                                                                                                                                             | Unknown                                                                                                                                                                                            | (Sagi and Fluhr, 2006)                                                                                                                                                                                                                                                                                             |
| <i>AtRbohH</i>                  | Q9FJD6 <sup>R</sup>                           | 886 | Expression in pollen tube.<br>Function: pollen tube tip growth.                                                                                                                                                                                                                                                                                                                                                | Protein Phosphorylation; Ca <sup>2+</sup>                                                                                                                                                          | (Kaya et al., 2014)<br>(Kaya et al., 2015)                                                                                                                                                                                                                                                                         |
| <i>AtRbohI</i>                  | Q9SUT8 <sup>R</sup>                           | 941 | Expression in root.<br>Function: hypoxic response, response to ethylene and hypoxia signaling.                                                                                                                                                                                                                                                                                                                 | Ethylene; Hypoxia signaling;<br>H <sub>2</sub> O <sub>2</sub> signaling                                                                                                                            | (Lin et al., 2017)                                                                                                                                                                                                                                                                                                 |
| <i>AtRbohJ</i>                  | Q9LZU9 <sup>R</sup>                           | 912 | Expression in pollen tube.<br>Function: pollen tube tip growth.                                                                                                                                                                                                                                                                                                                                                | Protein phosphorylation; Ca <sup>2+</sup>                                                                                                                                                          | (Kaya et al., 2014)<br>(Kaya et al., 2015)                                                                                                                                                                                                                                                                         |
| <b><i>Brassica oleracea</i></b> |                                               |     |                                                                                                                                                                                                                                                                                                                                                                                                                |                                                                                                                                                                                                    |                                                                                                                                                                                                                                                                                                                    |
| <i>BoRbohD</i>                  | D5LM24 <sup>U</sup>                           | 200 | Expression in whole plant                                                                                                                                                                                                                                                                                                                                                                                      | Unknown                                                                                                                                                                                            | (Jakubowicz et al., 2010)                                                                                                                                                                                                                                                                                          |
| <i>BoRbohF</i>                  | D5LM19 <sup>U</sup>                           | 194 | Expression in whole plant                                                                                                                                                                                                                                                                                                                                                                                      | Unknown                                                                                                                                                                                            | (Jakubowicz et al., 2010)                                                                                                                                                                                                                                                                                          |
| <i>Citrullus colocynthis</i>    |                                               |     |                                                                                                                                                                                                                                                                                                                                                                                                                |                                                                                                                                                                                                    |                                                                                                                                                                                                                                                                                                                    |
| <i>CcRbohD</i>                  | C1IHQ9 <sup>U</sup> ; EACF05505 <sup>G</sup>  | 926 | Expression in seeds. Function: drought tolerance; root development leaf morphogenesis.                                                                                                                                                                                                                                                                                                                         | Unknown                                                                                                                                                                                            | (Si et al., 2010)                                                                                                                                                                                                                                                                                                  |
| <i>Cucumis sativus</i>          |                                               |     |                                                                                                                                                                                                                                                                                                                                                                                                                |                                                                                                                                                                                                    |                                                                                                                                                                                                                                                                                                                    |
| <i>CsRboh</i>                   | B6DQ62 <sup>U</sup> ; A0A0A0LWE8 <sup>U</sup> | 889 | Expression in seeds; root.<br>Function: brassinosteroid-induced stress tolerance; salt tolerance and regulating stomatal closure; response to cadmium stress.                                                                                                                                                                                                                                                  | MAPK cascade; H <sub>2</sub> O <sub>2</sub> signaling pathway;<br>Brassinosteroid-induced pathway                                                                                                  | (Xia et al., 2009)<br>(Niu et al., 2018)<br>(Jakubowska et al., 2015)<br>(Jakubowska and Janicka, 2017)                                                                                                                                                                                                            |

7 **Table S1 Continued**

| Name                       | Accession No.             | AA.  | Tissue specificity and function                                                                                        | Regulation                                              | References           |
|----------------------------|---------------------------|------|------------------------------------------------------------------------------------------------------------------------|---------------------------------------------------------|----------------------|
| <i>Fragaria x ananassa</i> |                           |      |                                                                                                                        |                                                         |                      |
| <i>FvRbohA</i>             | gene31855 <sup>#</sup>    | 1027 | Expression in root, stem, leaf, flower, and fruit. Function: cold stress tolerance.                                    | Unknown                                                 | (Zhang et al., 2018) |
| <i>FvRbohB</i>             | gene22214 <sup>#</sup>    | 886  | Expression in root, stem, leaf, flower, and fruit. Function: cold stress tolerance.                                    | Unknown                                                 | (Zhang et al., 2018) |
| <i>FvRbohC</i>             | gene01814 <sup>#</sup>    | 1865 | Expression in chloroplast thylakoid membrane, root, stem, leaf, flower, and fruit.<br>Function: cold stress tolerance. | Unknown                                                 | (Zhang et al., 2018) |
| <i>FvRbohD</i>             | gene00215 <sup>#</sup>    | 935  | Expression in root, stem, leaf, flower, and fruit. Function: cold stress tolerance.                                    | Unknown                                                 | (Zhang et al., 2018) |
| <i>FvRbohE</i>             | gene12928 <sup>#</sup>    | 882  | Expression in root, stem, leaf, flower, and fruit. Function: cold stress tolerance.                                    | Unknown                                                 | (Zhang et al., 2018) |
| <i>FvRbohF</i>             | gene26084 <sup>#</sup>    | 791  | Expression in root, stem, leaf, flower, and fruit. Function: cold stress tolerance.                                    | Unknown                                                 | (Zhang et al., 2018) |
| <i>FvRbohH</i>             | gene14024 <sup>#</sup>    | 865  | Expression in flower, and fruit. Function: cold stress tolerance.                                                      | Unknown                                                 | (Zhang et al., 2018) |
| <i>Glycine max</i>         |                           |      |                                                                                                                        |                                                         |                      |
| <i>GmNOX1</i>              | Gma01G222700 <sup>P</sup> | 927  | Expressed in leaf.                                                                                                     | Response to JA, SA, ABA treatment                       | (Zhang et al., 2019) |
| <i>GmNOX2</i>              | Gma03G236300 <sup>P</sup> | 885  | Expression in the root.                                                                                                | Up-regulated under PEG stress and JA, SA, ABA treatment | (Zhang et al., 2019) |
| <i>GmNOX3</i>              | Gma04G203200 <sup>P</sup> | 928  | Expressed in pod.                                                                                                      | Unknown                                                 | (Zhang et al., 2019) |
| <i>GmNOX4</i>              | Gma05G021100 <sup>P</sup> | 820  | Expressed in root, early flower, stem and pod.                                                                         | Unknown                                                 | (Zhang et al., 2019) |
| <i>GmNOX5</i>              | Gma05G198700 <sup>P</sup> | 898  | Expressed in flower, leaf, pod, and stem.                                                                              | Up-regulated under PEG stress.                          | (Zhang et al., 2019) |
| <i>GmNOX6</i>              | Gma05G212500 <sup>P</sup> | 941  | Expression in stem, and pod.                                                                                           | Unknown                                                 | (Zhang et al., 2019) |
| <i>GmNOX7</i>              | Gma06G162300 <sup>P</sup> | 941  | Expressed in flower.                                                                                                   | Unknown                                                 | (Zhang et al., 2019) |
| <i>GmNOX8</i>              | Gma07G130800 <sup>P</sup> | 859  | Expressed in flower.                                                                                                   | Unknown                                                 | (Zhang et al., 2019) |
| <i>GmNOX9</i>              | Gma08G005900 <sup>P</sup> | 888  | Expressed in stem, and pod.                                                                                            | Unknown                                                 | (Zhang et al., 2019) |
| <i>GmNOX10</i>             | Gma08G018900 <sup>P</sup> | 941  | Expressed in root, seed, and flower.                                                                                   | Unknown                                                 | (Zhang et al., 2019) |
| <i>GmNOX11</i>             | Gma09G073200 <sup>P</sup> | 928  | Transcript accumulation in the early flower.                                                                           | Unknown                                                 | (Zhang et al., 2019) |
| <i>GmNOX12</i>             | Gma10G152200 <sup>P</sup> | 825  | Expression in the root                                                                                                 | Up-regulated under PEG stress and JA, SA, ABA treatment | (Zhang et al., 2019) |

9 **Table S1 Continued**

| Name                                  | Accession No.                               | AA. | Tissue specificity and function                                                                                         | Regulation                                              | References               |
|---------------------------------------|---------------------------------------------|-----|-------------------------------------------------------------------------------------------------------------------------|---------------------------------------------------------|--------------------------|
| <i>GmNOX13</i>                        | Gma11G020700 <sup>P</sup>                   | 927 | Expression in leaf, flower, and pod.                                                                                    | Unknown                                                 | (Zhang et al., 2019)     |
| <i>GmNOX14</i>                        | Gma15G182000 <sup>P</sup>                   | 936 | Transcript accumulation in the early flower.                                                                            | Unknown                                                 | (Zhang et al., 2019)     |
| <i>GmNOX15</i>                        | Gma17G078300 <sup>P</sup>                   | 821 | Expressed in root, early flower, stem and pod.                                                                          | Unknown                                                 | (Zhang et al., 2019)     |
| <i>GmNOX16</i>                        | Gma19G233900 <sup>P</sup>                   | 887 | Expression in the root                                                                                                  | Unknown                                                 | (Zhang et al., 2019)     |
| <i>GmNOX17</i>                        | Gma20G236200 <sup>P</sup>                   | 889 | Expression in the root                                                                                                  | Up-regulated under PEG stress and JA, SA, ABA treatment | (Zhang et al., 2019)     |
| <b><i>Lepidium sativum</i></b>        |                                             |     |                                                                                                                         |                                                         |                          |
| <i>LesarbohA</i>                      | JX312066 <sup>G</sup> ; J9WU02 <sup>U</sup> | 367 | Expression in seed, root, leaf, cotyledons, bud, flower.                                                                | Unknown                                                 | (Müller et al., 2012)    |
| <i>LesarbohB</i>                      | JX312067 <sup>G</sup> ; J9WPU6 <sup>U</sup> | 810 | Expression in seed, root, leaf, cotyledons, bud, flower.<br>Function: root development, Auxin signaling.                | Unknown                                                 | (Müller et al., 2012)    |
| <i>LesarbohD</i>                      | JX312068 <sup>G</sup> ; J9WLY1 <sup>U</sup> | 356 | Expression in seed, root, leaf, cotyledons, bud, flower.                                                                | Unknown                                                 | (Müller et al., 2012)    |
| <i>LesarbohF</i>                      | JX312069 <sup>G</sup> ; J9WMN4 <sup>U</sup> | 943 | Expression in seed, root, leaf, cotyledons, bud, flower.                                                                | Unknown                                                 | (Müller et al., 2012)    |
| <i>LesarbohH</i>                      | JX312070 <sup>G</sup>                       |     | Expression in seed, root, leaf, cotyledons, bud, flower.                                                                | Unknown                                                 | (Müller et al., 2012)    |
| <b><i>Lycopersicon esculentum</i></b> |                                             |     |                                                                                                                         |                                                         |                          |
| <i>LeRboh1</i>                        | Q9XEG2 <sup>U</sup>                         | 989 | Expression in flowers, roots, eaves, fruits. Function: response to pathogen and wound.                                  | Hormone                                                 | (Sagi et al., 2004)      |
| <i>LeWfi1</i>                         | Q9LDD7 <sup>U</sup>                         | 938 | Function: response to insect feeding and pathogen attack.                                                               | Hormone                                                 | (Sagi et al., 2004)      |
| <b><i>Malus × domestica</i></b>       |                                             |     |                                                                                                                         |                                                         |                          |
| <i>MdRbohD1</i>                       | MDP0000703059*                              | 927 | Expression in field grown trees, shoot and suspension culture cell.<br>Function: shoot development and stress response. | Unknown                                                 | (Cepauskas et al., 2016) |
| <i>MdRbohD2</i>                       | MDP0000262620*                              | 965 | Expression in field grown trees, shoot and suspension culture cell.<br>Function: shoot development and stress response. | Unknown                                                 | (Cepauskas et al., 2016) |
| <i>MdRbohD3</i>                       | MDP0000421679*                              | 727 | Expression in field grown trees, shoot and suspension culture cell.                                                     | Unknown                                                 | (Cepauskas et al., 2016) |
| <i>MdRbohK</i>                        | MDP0000280452*                              | 816 |                                                                                                                         | Unknown                                                 | (Cepauskas et al., 2016) |
| <i>MdRbohH1</i>                       | MDP0000160005*                              | 857 | Expression in vitro shoots, leaves.                                                                                     | Unknown                                                 | (Cepauskas et al., 2016) |

Table S1 Continued

| Name                                | Accession No.              | AA.  | Tissue specificity and function                                                                                                             | Regulation                                                    | References                                                                                         |
|-------------------------------------|----------------------------|------|---------------------------------------------------------------------------------------------------------------------------------------------|---------------------------------------------------------------|----------------------------------------------------------------------------------------------------|
| <i>MdRbohH2</i>                     | MDP0000195681*             | 886  | Expression in vitro shoots, suspension culture cell.                                                                                        | Unknown                                                       | (Cepauskas et al., 2016)                                                                           |
| <i>MdRbohE1</i>                     | MDP0000264232*             | 1145 |                                                                                                                                             | Unknown                                                       | (Cepauskas et al., 2016)                                                                           |
| <i>MdRbohE2</i>                     | MDP0000273819*             | 1064 | Expression in vitro shoots.                                                                                                                 | Unknown                                                       | (Cepauskas et al., 2016)                                                                           |
| <i>MdRbohF</i>                      | MDP0000920069*             | 486  | Expression in field grown trees. Function: shoot development and stress response.                                                           | Unknown                                                       | (Cepauskas et al., 2016)                                                                           |
| <b><i>Medicago truncatula</i></b>   |                            |      |                                                                                                                                             |                                                               |                                                                                                    |
| <i>MtRbohA</i>                      | Medtr1g099800 <sup>P</sup> | 929  | Expression in nodules, roots and root Hairs. Function: nodule nitrogen fixation.                                                            | Hypoxia                                                       | (Marino et al., 2011)                                                                              |
| <i>MtRbohB</i>                      | Medtr3g151540 <sup>P</sup> | 923  | Expression in stems, roots, root hairs, nodules, pods.                                                                                      | Unknown                                                       | (Marino et al., 2011)                                                                              |
| <i>MtRbohC</i>                      | Medtr3g151570 <sup>P</sup> | 917  | Expression in low expression. Function: root development, Auxin signaling.                                                                  | Unknown                                                       | (Marino et al., 2011)                                                                              |
| <i>MtRbohD</i>                      | Medtr3g151600 <sup>P</sup> | 729  | Expression in roots, root hairs.                                                                                                            | Unknown                                                       | (Marino et al., 2011)                                                                              |
| <i>MtRbohE</i>                      | Medtr4g144710 <sup>P</sup> | 932  | Expression in pods, flowers and stems.                                                                                                      | Unknown                                                       | (Marino et al., 2011)                                                                              |
| <i>MtRbohF</i>                      | Medtr7g067680 <sup>P</sup> | 849  | Expression in root hairs and roots. Function: root hair development.                                                                        | Unknown                                                       | (Marino et al., 2011)                                                                              |
| <i>MtRbohG</i>                      | Medtr7g138940 <sup>P</sup> | 895  | Expression in roots, stems, flowers, pods and leaves.                                                                                       | Unknown                                                       | (Marino et al., 2011)                                                                              |
| <b><i>Nicotiana attenuata</i></b>   |                            |      |                                                                                                                                             |                                                               |                                                                                                    |
| <i>NaRbohD</i>                      | B8PS20 <sup>U</sup>        | 937  | Expression in leaves. Function: Herbivore-elicited responses.                                                                               | JA                                                            | (Wu et al., 2013)                                                                                  |
| <b><i>Nicotiana benthamiana</i></b> |                            |      |                                                                                                                                             |                                                               |                                                                                                    |
| <i>NbRbohA</i>                      | Q84KK8 <sup>U</sup>        | 962  | Expression in leaves. Function: participate in H <sub>2</sub> O <sub>2</sub> Accumulation and pesistance to <i>Phytophthora infestans</i> . | Unknown                                                       | (Yoshioka et al., 2003)                                                                            |
| <i>NbRbohB</i>                      | Q84KK7 <sup>U</sup>        | 939  | Expression in leaves. Function: Transient PTI ROS burst and robust ETI ROS burst.                                                           | MAPK pathway; Phosphatidic acid; CBL10-CIPK6 complex          | (Yoshioka et al., 2003)<br>(Yoshioka et al., 2016)                                                 |
| <b><i>Nicotiana tabacum</i></b>     |                            |      |                                                                                                                                             |                                                               |                                                                                                    |
| <i>NtRbohD</i>                      | Q8LRN5 <sup>U</sup>        | 939  | Expression in pollen tube. Function: pollen tube growth; plant defence reactions; response to fungals.                                      | Ca <sup>2+</sup> signaling; Phospholipids and Rac/Rop GTPases | (Potocky et al., 2007)<br>(Potocky et al., 2012)<br>(Lequeu et al., 2005)<br>(Noirot et al., 2014) |
| <i>NtRbohF</i>                      | A7LP32 <sup>U</sup>        | 962  | Expression in pollen tube. Function: pollen tube growth.                                                                                    | Ca <sup>2+</sup> signaling; Phospholipids and Rac/Rop GTPases | (Potocky et al., 2007)<br>(Potocky et al., 2012)                                                   |
| <i>NtNOX1</i>                       | DQ497543 <sup>G</sup>      | 200  | Expression in nectar. Function: microoganisms defence.                                                                                      | Unknown                                                       | (Carter et al., 2007)                                                                              |

Table S1 Continued

| Name                        | Accession No.                                         | AA. | Tissue specificity and function                                                                                                                          | Regulation                    | References                                                                   |
|-----------------------------|-------------------------------------------------------|-----|----------------------------------------------------------------------------------------------------------------------------------------------------------|-------------------------------|------------------------------------------------------------------------------|
| <i>Pyrus bretschneideri</i> |                                                       |     |                                                                                                                                                          |                               |                                                                              |
| <i>PbRBOHA</i>              | Pbr018609.1 <sup>GD</sup>                             | 962 | Distributed on plasma membrane; Function: may play an important role in ROS metabolism during the lignification of pear stone cells.                     | Response to SA, ABA and MeJA. | (Cheng, et al., 2019)                                                        |
| <i>PbRBOHB</i>              | Pbr037815.1 <sup>GD</sup>                             | 964 | Function: may play crucial role during the lignification of pear stone cells                                                                             | Response to SA, ABA and MeJA. | (Cheng, et al., 2019)                                                        |
| <i>PbRBOHC</i>              | Pbr038667.1 <sup>GD</sup>                             | 947 | Distributed on plasma membrane;                                                                                                                          | Response to SA, ABA and MeJA. | (Cheng, et al., 2019)                                                        |
| <i>PbRBOHD</i>              | Pbr006277.1 <sup>GD</sup>                             | 978 | Distributed in cytoplasm; Function: may play an important role in ROS metabolism during the lignification of pear stone cells.                           | Response to SA, ABA and MeJA. | (Cheng, et al., 2019)                                                        |
| <i>PbRBOHE</i>              | Pbr036006.1 <sup>GD</sup>                             | 915 | Distributed in cytoplasm;                                                                                                                                | Response to SA, ABA and MeJA. | (Cheng, et al., 2019)                                                        |
| <i>PbRBOHF</i>              | Pbr003403.1 <sup>GD</sup>                             | 914 | Distributed in cytoplasm;                                                                                                                                | Response to SA, ABA and MeJA. | (Cheng, et al., 2019)                                                        |
| <i>PbRBOHG</i>              | Pbr023445.1 <sup>GD</sup>                             | 856 | Distributed in cytoplasm;                                                                                                                                | Response to SA, ABA and MeJA. | (Cheng, et al., 2019)                                                        |
| <i>PbRBOHH</i>              | Pbr033955.1 <sup>GD</sup>                             | 860 | Distributed in cytoplasm;                                                                                                                                | Response to SA, ABA and MeJA. | (Cheng, et al., 2019)                                                        |
| <i>PbRBOHI</i>              | Pbr007212.1 <sup>GD</sup>                             | 779 | Distributed on plasma membrane;                                                                                                                          | Response to SA, ABA and MeJA. | (Cheng, et al., 2019)                                                        |
| <i>PbRBOHJ</i>              | Pbr037399.1 <sup>GD</sup>                             | 701 | Distributed in chloroplast;                                                                                                                              | Response to SA, ABA and MeJA. | (Cheng, et al., 2019)                                                        |
| <i>Phaseolus vulgaris</i>   |                                                       |     |                                                                                                                                                          |                               |                                                                              |
| <i>PvRbohA</i>              | Phvulv091020621m.g <sup>P</sup>                       | 899 | Expression in roots, leaves, shoots and nodules.<br>Function: enhancing <i>Rhizobium</i> infection and its release into the nodule cells.                | Unknown                       | (Montiel et al., 2012)                                                       |
| <i>PvRbohB</i>              | Phvulv091013731m.g <sup>P</sup> ; H2E690 <sup>U</sup> | 881 | Expression in shoots, roots, nodules; Low in leaves. Function: root growth and development, rhizobial invasion, nitrogen fixation and symbiotic process. | Unknown                       | (Montiel et al., 2012)<br>(Montiel et al., 2013)<br>(Arthikala et al., 2014) |
| <i>PvRbohC</i>              | Phvulv091002467m.g <sup>P</sup>                       | 930 | Expression in roots, leaves, shoots and nodules.                                                                                                         | Unknown                       | (Montiel et al., 2012)                                                       |
| <i>PvRbohD</i>              | Phvulv091005473m.g <sup>P</sup>                       | 890 | Expression in shoots and leaves. Function: nodule nitrogen fixation.                                                                                     | Unknown                       | (Montiel et al., 2012)                                                       |
| <i>PvRbohE</i>              | Phvulv091006195m.g <sup>P</sup>                       | 926 | Unknown                                                                                                                                                  | Unknown                       | (Montiel et al., 2012)                                                       |
| <i>PvRbohF</i>              | Phvulv091020738m.g <sup>P</sup>                       | 946 | Function: root development, Auxin signaling.                                                                                                             | Unknown                       | (Montiel et al., 2012)                                                       |
| <i>PvRbohG</i>              | Phvulv091007712m.g <sup>P</sup>                       | 823 | Unknown                                                                                                                                                  | Unknown                       | (Montiel et al., 2012)                                                       |

Table S1 Continued

| Name                              | Accession No.                                     | AA. | Tissue specificity and function                                                                                                                          | Regulation            | References                                                                                        |
|-----------------------------------|---------------------------------------------------|-----|----------------------------------------------------------------------------------------------------------------------------------------------------------|-----------------------|---------------------------------------------------------------------------------------------------|
| <i>PvRbohH</i>                    | Phvulv091002934m.g <sup>p</sup>                   | 914 | Unknown                                                                                                                                                  | Unknown               | (Montiel et al., 2012)                                                                            |
| <i>PvRbohI</i>                    | Phvulv091023888m.g <sup>p</sup>                   | 926 | Expression in shoots. Function: root hair development.                                                                                                   | Unknown               | (Montiel et al., 2012)                                                                            |
| <b><i>Solanum tuberosum</i></b>   |                                                   |     |                                                                                                                                                          |                       |                                                                                                   |
| <i>StRbohA</i>                    | AB050660 <sup>G</sup>                             | 963 | Expression in tubers.<br>Function: wound-induced oxidative burst/ microbial resistant, dormancy break.                                                   | GA/ABA                | (Kumar et al., 2007)<br>(Liu et al., 2017)                                                        |
| <i>StRbohB</i>                    | AB050661 <sup>G</sup>                             | 867 | Expression in leaves, sprouting tubers. Function: pathogen resistance and dormancy break                                                                 | MAPK; GA/ABA          | (Kumar et al., 2007)<br>(Yamamizo et al., 2007)<br>(Liu et al., 2017)<br>(Kobayashi et al., 2007) |
| <i>StRbohC</i>                    | AB198716 <sup>G</sup>                             | 938 | Expression in leaves. Function: pathogen resistance.                                                                                                     | MAPK cascade, MeJA    | (Kumar et al., 2007)<br>(Yamamizo et al., 2007)                                                   |
| <i>StRbohD</i>                    | AB198717 <sup>G</sup>                             | 858 | Expression in leaves. Function: pathogen resistance.                                                                                                     | MAPK cascade, HWC, SA | (Kumar et al., 2007)<br>(Yamamizo et al., 2007)                                                   |
| <i>StRbohF</i>                    | AB064343 <sup>G</sup>                             | 944 | Unknown                                                                                                                                                  | Unknown               | (Kumar et al., 2007)                                                                              |
| <b><i>Vicia faba</i></b>          |                                                   |     |                                                                                                                                                          |                       |                                                                                                   |
| <i>VfRbohA</i>                    | G4XDS1 <sup>U</sup> ; JF784279 <sup>G</sup>       | 894 | Expression in cotyledons                                                                                                                                 | Ethylene              | (Andriunas et al., 2012)                                                                          |
| <i>VfRbohB</i>                    | JF784281 <sup>G</sup>                             | 375 | Unknown                                                                                                                                                  | Unknown               | (Andriunas et al., 2012)                                                                          |
| <i>VfRbohC</i>                    | G4XDS2 <sup>U</sup> ; JF784280 <sup>G</sup>       | 950 | Unknown                                                                                                                                                  | Unknown               | (Andriunas et al., 2012)                                                                          |
| <b><i>Vitis vinifera</i></b>      |                                                   |     |                                                                                                                                                          |                       |                                                                                                   |
| <i>VvRbohA</i>                    | XP_002277529.1 <sup>G</sup> ; F6HUN7 <sup>U</sup> | 943 | Expression in root; tendril; stem, leaf, ovule, inflorescence, berry.<br>Function: salt and drought response.                                            | Unknown               | (Cheng et al., 2013)                                                                              |
| <i>VvRbohB</i>                    | XP_002283888.1 <sup>G</sup> ; F6I4L7 <sup>U</sup> | 894 | Expression in root; tendril; stem, leaf, ovule, inflorescence, berry; inflorescence.<br>Function: salt and drought response; powdery mildew inoculation. | Unknown               | (Cheng et al., 2013)                                                                              |
| <i>VvRbohD</i>                    | XP_002268641.1 <sup>G</sup> ;                     | 922 | Expression in root; tendril; stem, leaf, ovule, inflorescence, berry; inflorescence.<br>Function: response to salicylic acid and powdery mildew.         | Unknown               | (Cheng et al., 2013)                                                                              |
| <i>VvRbohE</i>                    | XP_002277540.1 <sup>G</sup> ;                     | 893 | Expression in ovule, inflorescence, root, leaf, stem, tendril and berry.                                                                                 | Unknown               | (Cheng et al., 2013)                                                                              |
| <i>VvRbohH</i>                    | XP_002281695.1 <sup>G</sup>                       | 841 | Expression in tendril, root, stem, inflorescence, leaf; berry and ovule.<br>Function: response to salicylic acid treatment.                              | Unknown               | (Cheng et al., 2013)                                                                              |
| <b><i>Festuca arundinacea</i></b> |                                                   |     |                                                                                                                                                          |                       |                                                                                                   |
| <i>FRbohD</i>                     | KF811502 <sup>G</sup>                             | 716 | Expression in leave and root. Function: drought tolerance.                                                                                               | Unknown               | (Rohollahi et al., 2018)                                                                          |



Table S1 Continued

| Name                    | Accession No.                               | AA. | Tissue specificity and function                                                                                                                                    | Regulation                                              | References                                                                                |
|-------------------------|---------------------------------------------|-----|--------------------------------------------------------------------------------------------------------------------------------------------------------------------|---------------------------------------------------------|-------------------------------------------------------------------------------------------|
| <i>Hordeum vulgare</i>  |                                             |     |                                                                                                                                                                    |                                                         |                                                                                           |
| <i>HvRbohA</i>          | A2VB85 <sup>U</sup>                         | 963 | Expression in leave. Function: response to pathogen; facilitation to fungal penetration.                                                                           | Unknown                                                 | (Trujillo et al., 2006)                                                                   |
| <i>HvRbohB1</i>         | B2D0N5 <sup>U</sup> ; EU566852 <sup>G</sup> | 845 | Expression in immature head, root, coleoptile tissues.                                                                                                             | Unknown                                                 | (Lightfoot et al., 2008)                                                                  |
| <i>HvRbohB2</i>         | B2D0N6 <sup>U</sup> ; EU566853 <sup>G</sup> | 905 | Expression in head, root and coleoptile; low in young leaf and flag leaf.                                                                                          | GA; ABA                                                 | (Lightfoot et al., 2008)<br>(Ishibashi et al., 2015)                                      |
| <i>HvRbohE</i>          | B2D0N7 <sup>U</sup> ; EU566854 <sup>G</sup> | 986 | Expression in head, root, coleoptile.                                                                                                                              | GA; ABA                                                 | (Lightfoot et al., 2008)                                                                  |
| <i>HvRbohB1</i>         | B2D0N5 <sup>U</sup> ; EU566852 <sup>G</sup> | 845 | Expression in immature head, root, coleoptile tissues.                                                                                                             | Unknown                                                 | (Lightfoot et al., 2008)                                                                  |
| <i>HvRbohB2</i>         | B2D0N6 <sup>U</sup> ; EU566853 <sup>G</sup> | 905 | Expression in head, root and coleoptile; low in young leaf and flag leaf.                                                                                          | GA; ABA                                                 | (Lightfoot et al., 2008)<br>(Ishibashi et al., 2015)                                      |
| <i>HvRbohE</i>          | B2D0N7 <sup>U</sup> ; EU566854 <sup>G</sup> | 986 | Expression in head, root, coleoptile.                                                                                                                              | GA; ABA                                                 | (Lightfoot et al., 2008)                                                                  |
| <i>HvRbohF1</i>         | B2D0N8 <sup>U</sup> ; EU566855 <sup>G</sup> | 946 | Expression in root. Function: pathogen infection responses.                                                                                                        | Unknown                                                 | (Lightfoot et al., 2008)                                                                  |
| <i>HvRbohF2</i>         | B2D0N9 <sup>U</sup> ; EU566856 <sup>G</sup> | 963 | Expression in young and flag leaf. Function: pathogen infection responses.                                                                                         | GA; ABA                                                 | (Lightfoot et al., 2008)                                                                  |
| <i>HvRbohJ</i>          | B2D0P0 <sup>U</sup> ; EU566857 <sup>G</sup> | 843 | Unknown                                                                                                                                                            | Unknown                                                 | (Lightfoot et al., 2008)                                                                  |
| <i>Olea europaea L.</i> |                                             |     |                                                                                                                                                                    |                                                         |                                                                                           |
| <i>OeRbohH</i>          | KX648357G                                   | 833 | Expression in olive pollen; Function: pollen germination and pollen tube growth.                                                                                   | High sensitivity to DPI (diphenylene iodonium chloride) | (Jimenez-Quesada et al., 2019)                                                            |
| <i>Oryza sativa</i>     |                                             |     |                                                                                                                                                                    |                                                         |                                                                                           |
| <i>OsRbohA</i>          | Q0JJJ9 <sup>U</sup>                         | 743 | Function: plant immune response; development regulation and drought tolerance; ABA-induced $\cdot\text{O}_2^-$ generation in the initial stage of leaf senescence. | Unknown                                                 | (Yoshie et al., 2005)<br>(Chang et al., 2016)<br>(Wang et al., 2016)<br>(Li et al., 2018) |
| <i>OsRbohB</i>          | Q5ZAJ0 <sup>U</sup> ; BAS72095 <sup>G</sup> | 905 | Function: plant immune response.                                                                                                                                   | Ca <sup>2+</sup> ; Rac GTPase                           | (Yoshie et al., 2005)<br>(Wong et al., 2007)                                              |
| <i>OsRbohC</i>          | Q65XC8 <sup>U</sup> ; BAS95006 <sup>G</sup> | 951 | Function: radicle and root elongation during seed germination; ABA-induced $\cdot\text{O}_2^-$ generation in the initial stage of leaf senescence.                 | Unknown                                                 | (Li et al., 2017)<br>(Li et al., 2018)                                                    |
| <i>OsRbohD</i>          | Q0DHH6 <sup>U</sup> ; BAS94449 <sup>G</sup> | 819 | Function: plant immune response.                                                                                                                                   | Unknown                                                 | (Yoshie et al., 2005)                                                                     |

Table S1 Continued

| Name                              | Accession No.                                         | AA.  | Tissue specificity and function                                                                                                                                                                   | Regulation                                                                                            | References                                                         |
|-----------------------------------|-------------------------------------------------------|------|---------------------------------------------------------------------------------------------------------------------------------------------------------------------------------------------------|-------------------------------------------------------------------------------------------------------|--------------------------------------------------------------------|
| <i>OsRbohE</i>                    | Q8S1T0 <sup>U</sup> ; BAS75100 <sup>G</sup>           | 843  | Function: plant immune response and drought tolerance; regulate root hair initiation and elongation; ABA-induced ·O <sub>2</sub> <sup>-</sup> generation in the initial stage of leaf senescence. | Unknown                                                                                               | (Yoshie et al., 2005)<br>(Chang et al., 2016)<br>(Li et al., 2018) |
| <i>OsRbohF</i>                    | Q0J595 <sup>U</sup> ; BAT05718 <sup>G</sup>           | 1033 | Function: defence response.                                                                                                                                                                       | Unknown                                                                                               | (Yoshie et al., 2005)                                              |
| <i>OsRbohG</i>                    | Q69LJ7 <sup>U</sup> ; BAT08263 <sup>G</sup>           | 1007 | Function: radicle and root elongation during seed germination; ABA-induced ·O <sub>2</sub> <sup>-</sup> generation in the initial stage of leaf senescence.                                       | Unknown                                                                                               | (Li et al., 2017)<br>(Li et al., 2018)                             |
| <i>OsRbohH</i>                    | Q2QP56 <sup>U</sup> ; BAT17505 <sup>G</sup>           | 909  | Expression in roots;<br>Function: ethylene-induced aerenchyma formation; radicle and root elongation during seed germination.                                                                     | Interact with CDPK5/CDPK13                                                                            | (Yamauchi et al., 2017)<br>(Li et al., 2017)                       |
| <i>OsRbohI</i>                    | Q2R351 <sup>U</sup> ; ABA94089 <sup>G</sup>           | 936  | Unknown                                                                                                                                                                                           | Unknown                                                                                               | (Chang et al., 2016)                                               |
| <b><i>Potamogeton crispus</i></b> |                                                       |      |                                                                                                                                                                                                   |                                                                                                       |                                                                    |
| <i>PcRboh1</i>                    | Q9XEG3 <sup>U</sup>                                   | 180  | Unknown                                                                                                                                                                                           | Unknown                                                                                               | (Amicucci et al., 1999)                                            |
| <b><i>Triticum aestivum</i></b>   |                                                       |      |                                                                                                                                                                                                   |                                                                                                       |                                                                    |
| <i>TaNOX1</i>                     | TRIAE_CS42_1BL_TGACv1_030848_AA0102150.1 <sup>E</sup> | 832  | Expression in function. Function: plant immune response.                                                                                                                                          | Sensitive to biotic and abiotic stress; cold ↑                                                        | (Hu et al., 2018)                                                  |
| <i>TaNOX2</i>                     | TRIAE_CS42_1AL_TGACv1_002261_AA0040140.2 <sup>E</sup> | 972  | Expression in whole plant. Function: plant growth regulation and stress responses.                                                                                                                | Sensitive to biotic and abiotic stress and ABA, SA, MeJA treatment; NaCl ↑, cold ↑, drought ↑, heat ↑ | (Hu et al., 2018)                                                  |
| <i>TaNOX3</i>                     | TRIAE_CS42_1DL_TGACv1_061195_AA0188450.1 <sup>E</sup> | 1160 | Expression in root and elongation zone.<br>Function: root development and seed after ripening.                                                                                                    | Sensitive to biotic and abiotic stress and SA treatment; drought ↑, cold ↓                            | (Hu et al., 2018)                                                  |
| <i>TaNOX5</i>                     | TRIAE_CS42_3AL_TGACv1_195088_AA0644550.1 <sup>E</sup> | 851  | Function: plant immune response.                                                                                                                                                                  | Sensitive to biotic and abiotic stress and ABA treatment                                              | (Hu et al., 2018)                                                  |
| <i>TaNOX6</i>                     | TGACv1_scaffold_195736_3AL:18346-27475 <sup>E</sup>   | 976  | Expression in stem.                                                                                                                                                                               | Sensitive to biotic and abiotic stress;<br>Development regulation; cold ↑                             | (Hu et al., 2018)                                                  |
| <i>TaNOX7</i>                     | TGACv1_scaffold_211536_3AS:54051-73959 <sup>E</sup>   | 901  | Expression in seed.<br>Function: response to biotic stresses and ABA treatment.                                                                                                                   | Sensitive to biotic and abiotic stress; ABA and MeJA treatment;                                       | (Hu et al., 2018)                                                  |
| <i>TaNOX8</i>                     | TGACv1_scaffold_343050_4DL:40633-46817 <sup>E</sup>   | 841  | Expression in seed, stem.<br>Function: response to biotic stresses and ABA treatment.                                                                                                             | Sensitive to biotic and abiotic stress; heat ↑                                                        | (Hu et al., 2018)                                                  |
| <i>TaNOX9</i>                     | TGACv1_scaffold_343029_4DL:55967-62975 <sup>E</sup>   | 921  | Unknown                                                                                                                                                                                           | Sensitive to biotic and abiotic stress; heat ↑                                                        | (Hu et al., 2018)                                                  |
| <i>TaNOX10</i>                    | TGACv1_scaffold_404354_5BL:132580-133920 <sup>E</sup> | 918  | Expression in whole plant (except seedling, seed, booting,).                                                                                                                                      | Sensitive to biotic stress and MeJA treatment                                                         | (Hu et al., 2018)                                                  |
| <i>TaNOX11</i>                    | TGACv1_scaffold_375026_5AL:12006-19009 <sup>E</sup>   | 919  | Unknown                                                                                                                                                                                           | Sensitive to biotic stress                                                                            | (Hu et al., 2018)                                                  |

Table S1 Continued

| Name                   | Accession No.                                         | AA.  | Tissue specificity and function                                                                           | Regulation                                                                    | References             |
|------------------------|-------------------------------------------------------|------|-----------------------------------------------------------------------------------------------------------|-------------------------------------------------------------------------------|------------------------|
| <i>TaNOX12</i>         | TGACv1_scaffold_406190_5BL:21326-32065 <sup>E</sup>   | 985  | Expression in stem.                                                                                       | Sensitive to biotic and abiotic stress, ABA treatment; drought↑, cold↑, NaCl↓ | (Hu et al., 2018)      |
| <i>TaNOX13</i>         | TGACv1_scaffold_377290_5AL:27991-34187 <sup>E</sup>   | 847  | Expression in seed, stem.<br>Function: response to biotic stresses and ABA treatment.                     | Sensitive to biotic and abiotic stress, ABA treatment; drought↑, cold↑        | (Hu et al., 2018)      |
| <i>TaNOX14</i>         | TGACv1_scaffold_393979_5AS:10356-14798 <sup>E</sup>   | 877  | Expression in stem.<br>Function: response to biotic stresses and ABA treatment.                           | Sensitive to biotic stress; Development regulation                            | (Hu et al., 2018)      |
| <i>TaNOX15</i>         | TGACv1_scaffold_513624_6BS:121044-129225 <sup>E</sup> | 957  | Expression in seed. Function: root-hair-tip growth.                                                       | Unknown                                                                       | (Hu et al., 2018)      |
| <i>TaNOX-like1</i>     | TGACv1_scaffold_001598_1AL:24546-36314 <sup>E</sup>   | 651  | Unknown                                                                                                   | Unknown                                                                       | (Hu et al., 2018)      |
| <i>TaNOX-like2</i>     | TGACv1_scaffold_030295_1BL:132356-145070 <sup>E</sup> | 675  | Unknown                                                                                                   | Unknown                                                                       | (Hu et al., 2018)      |
| <i>TaNOX-like3</i>     | TGACv1_scaffold_032482_1BL:22766-37498 <sup>E</sup>   | 602  | Unknown                                                                                                   | Unknown                                                                       | (Hu et al., 2018)      |
| <i>TaNOX-like4</i>     | TGACv1_scaffold_542557_6DS:1-2175 <sup>E</sup>        | 506  | Unknown                                                                                                   | Unknown                                                                       | (Hu et al., 2018)      |
| <b><i>Zea mays</i></b> |                                                       |      |                                                                                                           |                                                                               |                        |
| <i>ZmRbohA</i>         | Q0MRQ8 <sup>U</sup>                                   | 852  | Expression in leaves.                                                                                     | ABA, H <sub>2</sub> O <sub>2</sub> , MAPK                                     | (Lin et al., 2009a)    |
| <i>ZmRbohB-α</i>       | DQ890023 <sup>G</sup>                                 | 942  | Expression in leaves, stems, roots, seedlings.<br>Function: respond to NaCl, cold, heat, UV, wounding.    | ABA, H <sub>2</sub> O <sub>2</sub> , MAPK                                     | (Lin et al., 2009b)    |
| <i>ZmRbohB-β</i>       | C0J4N7 <sup>U</sup> ; EU807966 <sup>G</sup>           | 842  | Expression in stems, leaves, roots, male flowers.<br>Function: respond to NaCl, cold, heat, UV, wounding. | ABA, H <sub>2</sub> O <sub>2</sub> , MAPK                                     | (Lin et al., 2009b)    |
| <i>ZmRbohC</i>         | A5H238 <sup>U</sup> ; DQ897930 <sup>G</sup>           | 948  | Unknown                                                                                                   | ABA, H <sub>2</sub> O <sub>2</sub> , MAPK                                     | (Lin et al., 2009a)    |
| <i>ZmRbohD</i>         | TGACv1_scaffold_195736_3AL:18346-27475 <sup>E</sup>   | 648  | Unknown                                                                                                   | ABA, H <sub>2</sub> O <sub>2</sub> , MAPK                                     | (Lin et al., 2009a)    |
| <i>ZmRbohE</i>         | GRMZM2G448185 <sup>P</sup> ; EU825209 <sup>G</sup>    | 1009 | Unknown                                                                                                   | Unknown                                                                       | (Montiel et al., 2012) |
| <i>ZmRbohF</i>         | GRMZM2G300965 <sup>P</sup>                            | 931  | Unknown                                                                                                   | Unknown                                                                       | (Montiel et al., 2012) |
| <i>ZmRbohG</i>         | GRMZM2G037993 <sup>P</sup>                            | 882  | Unknown                                                                                                   | Unknown                                                                       | (Montiel et al., 2012) |
| <i>ZmRbohH</i>         | GRMZM2G323731 <sup>P</sup> ; AFW56509 <sup>G</sup>    | 822  | Unknown                                                                                                   | Unknown                                                                       | (Montiel et al., 2012) |
| <i>ZmRbohI</i>         | GRMZM2G022547 <sup>P</sup>                            | 897  | Unknown                                                                                                   | Unknown                                                                       | (Montiel et al., 2012) |
| <i>ZmRbohJ</i>         | GRMZM2G065144 <sup>P</sup>                            | 948  | Unknown                                                                                                   | Unknown                                                                       | (Montiel et al., 2012) |
| <i>ZmRbohK</i>         | GRMZM2G358619 <sup>P</sup>                            | 976  | Unknown                                                                                                   | Unknown                                                                       | (Montiel et al., 2012) |

17

Table S1 Continued

| Name                           | Accession No.              | AA.     | Tissue specificity and function                                                                      | Regulation | References             |
|--------------------------------|----------------------------|---------|------------------------------------------------------------------------------------------------------|------------|------------------------|
| <i>RTH5</i>                    | GRMZM2G426953 <sup>G</sup> | Unknown | Expression in epidermal cells of the primary root.<br>Function: root hair initiation and elongation. | Unknown    | (Nestler et al., 2014) |
| <i>Chondrus crispus</i>        |                            |         |                                                                                                      |            |                        |
| <i>CcRboh</i>                  | Q2FA46 <sup>U</sup>        | 825     | Function: response to pathogen/MeJA/Atrazine/Metolachlor/H <sub>2</sub> O <sub>2</sub>               | Unknown    | (Herve' et al., 2006)  |
| <i>Cyanidioschyzon merolae</i> |                            |         |                                                                                                      |            |                        |
| <i>CmRboh1</i>                 | M1VG56 <sup>U</sup>        | 864     | Unknown                                                                                              | Unknown    | (Herve' et al., 2006)  |
| <i>CmRboh2</i>                 | M1UWF8 <sup>U</sup>        | 935     | Unknown                                                                                              | Unknown    | (Herve' et al., 2006)  |
| <i>Porphyria yezoensis</i>     |                            |         |                                                                                                      |            |                        |
| <i>PyRboh</i>                  | Q2F9N3 <sup>U</sup>        | 903     | Unknown                                                                                              | Unknown    | (Herve' et al., 2006)  |

18

AA.: amino acid; <sup>R</sup> Reviewed UniProt IDs; <sup>U</sup> Unreviewed UniProt IDs; <sup>E</sup> Ensembl Plants IDs; <sup>P</sup> Phytozome IDs; <sup>G</sup> GenBank; \*Sequence From Apple Genome; <sup>#</sup>Genome Database for Rosaceae; <sup>GD</sup> GIGADB Databases † Up Regulated; ‡ Down Regulated

---

## Reference

- Amicucci, E., Gaschler, K., and Ward, J.M. (1999). NADPH oxidase genes from tomato (*Lycopersicon esculentum*) and curly-leaf pondweed (*Potamogeton crispus*). *Plant Biology* 1:524-528.
- Andriunas, F., Zhang, H., Xia, X., Offler, C., McCurdy, D., and Patrick, J. (2012). Reactive oxygen species form part of a regulatory pathway initiating trans-differentiation of epidermal transfer cells in *Vicia faba* cotyledons. *J. Exp. Bot.* 63:3617-3629.
- Arthikala, M.K., Sanchez-Lopez, R., Nava, N., Santana, O., Cardenas, L., and Quinto, C. (2014). *RbohB*, a *Phaseolus vulgaris* NADPH oxidase gene, enhances symbiosome number, bacteroid size, and nitrogen fixation in nodules and impairs mycorrhizal colonization. *New Phytol.* 202:886-900.
- Ben Rejeb, K., Benzarti, M., Debez, A., Bailly, C., Savoure, A., and Abdelly, C. (2015a). NADPH oxidase-dependent H<sub>2</sub>O<sub>2</sub> production is required for salt-induced antioxidant defense in *Arabidopsis thaliana*. *J. Plant Physiol.* 174:5-15.
- Ben Rejeb, K., Lefebvre-De Vos, D., Le Disquet, I., Leprince, A.S., Bordenave, M., Maldiney, R., Jdey, A., Abdelly, C., and Savoure, A. (2015b). Hydrogen peroxide produced by NADPH oxidases increases proline accumulation during salt or mannitol stress in *Arabidopsis thaliana*. *New Phytol.* 208:1138-1148.
- Carter, C., Healy, R., O'Tool, N.M., Naqvi, S.M., Ren, G., Park, S., Beattie, G.A., Horner, H.T., and Thornburg, R.W. (2007). Tobacco nectaries express a novel NADPH oxidase implicated in the defense of floral reproductive tissues against microorganisms. *Plant Physiol.* 143:389-399.
- Cepauskas, D., Miliute, I., Staniene, G., Gelvonauskiene, D., Stanys, V., Jesaitis, A.J., and Baniulis, D. (2016). Characterization of apple NADPH oxidase genes and their expression associated with oxidative stress in shoot culture in vitro. *Plant Cell Tiss. Org.* 124:621-633.
- Chang, Y.L., Li, W.Y., Miao, H., Yang, S.Q., Li, R., Wang, X., Li, W.Q., and Chen, K.M. (2016). Comprehensive Genomic Analysis and Expression Profiling of the NOX Gene Families under Abiotic Stresses and Hormones in Plants. *Genome Biol. Evol* 8:791-810.
- Chaouch, S., Queval, G., and Noctor, G. (2012). AtRbohF is a crucial modulator of defence-associated metabolism and a key actor in the interplay between intracellular oxidative stress and pathogenesis responses in *Arabidopsis*. *Plant J.* 69:613-627.
- Chen, D., Cao, Y., Li, H., Kim, D., Ahsan, N., Thelen, J., and Stacey, G. (2017). Extracellular ATP elicits DORN1-mediated RBOHD phosphorylation to regulate stomatal aperture. *Nat. Commun.* 8:2265.
- Cheng, C., Xu, X., Gao, M., Li, J., Guo, C., Song, J., and Wang, X. (2013). Genome-wide analysis of respiratory burst oxidase homologs in grape (*Vitis vinifera* L.). *Int. J. Mol. Sci.* 14:24169-24186.
- Cheng, X., Li, G., Manzoor, M. A., Wang, H., Abdullah, M., Su, X., Zhang, J., Jiang, T., Jin, Q., Cai, Y., and Lin, Y. (2019). In Silico Genome-Wide Analysis of Respiratory Burst Oxidase Homolog (Rboh) Family Genes in Five Fruit-Producing Trees, and Potential Functional Analysis on Lignification of Stone Cells in Chinese White Pear. *Cells* 8: 520.
- Deinlein, U., Stephan, A.B., Horie, T., Luo, W., Xu, G., and Schroeder, J.I. (2014). Plant salt-tolerance mechanisms. *Trends Plant Sci.* 19:371-379.

- 
- Dubiella, U., Seybold, H., Durian, G., Komander, E., Lassig, R., Witte, C.P., Schulze, W.X., and Romeis, T. (2013). Calcium-dependent protein kinase/NADPH oxidase activation circuit is required for rapid defense signal propagation. *Proc. Natl Acad. Sci. USA* 110:8744-8749.
- Foley, R.C., Gleason, C.A., Anderson, J.P., Hamann, T., and Singh, K.B. (2013). Genetic and genomic analysis of *Rhizoctonia solani* interactions with *Arabidopsis*; evidence of resistance mediated through NADPH oxidases. *PloS one* 8:e56814.
- Foreman, J., Demidchik, V., Bothwell, J.H., Mylona, P., Miedema, H., Torres, M.A., Linstead, P., Costa, S., Brownlee, C., Jones, J.D., et al. (2003). Reactive oxygen species produced by NADPH oxidase regulate plant cell growth. *Nature* 422:442-446.
- Gupta, D.K., Inouhe, M., Rodriguez-Serrano, M., Romero-Puertas, M.C., and Sandalio, L.M. (2013). Oxidative stress and arsenic toxicity: role of NADPH oxidases. *Chemosphere* 90:1987-1996.
- Gupta, D.K., Pena, L.B., Romero-Puertas, M.C., Hernandez, A., Inouhe, M., and Sandalio, L.M. (2017). NADPH oxidases differentially regulate ROS metabolism and nutrient uptake under cadmium toxicity. *Plant Cell Environ.* 40:509-526.
- Herve', C., Tonon, T., Colle'n, J., Corre, E., and Boyen, C. (2006). NADPH oxidases in Eukaryotes: red algae provide new hints! *Curr. Genet.* 49:190-204.
- Hu, C., Wei, X., Yuan, B., Yao, L., Ma, T., Zhang, P., Wang, X., Wang, P., Liu, W., Li, W., et al. (2018). Genome-wide identification and functional analysis of NADPH oxidase family genes in wheat during development and environmental stress responses. *Front. Plant Sci.* 9:906.
- Ishibashi, Y., Kasa, S., Sakamoto, M., Aoki, N., Kai, K., Yuasa, T., Hanada, A., Yamaguchi, S., and Iwaya-Inoue, M. (2015). A role for reactive oxygen species produced by NADPH oxidases in the embryo and aleurone cells in barley seed germination. *PloS one* 10:e0143173.
- Jakubowicz, M., Galganska, H., Nowak, W., and Sadowski, J. (2010). Exogenously induced expression of ethylene biosynthesis, ethylene perception, phospholipase D, and Rboh-oxidase genes in broccoli seedlings. *J. Exp. Bot.* 61:3475-3491.
- Jakubowska, D., Janicka-Russak, M., Kabala, K., Migocka, M., and Reda, M. (2015). Modification of plasma membrane NADPH oxidase activity in cucumber seedling roots in response to cadmium stress. *Plant Sci.* 234:50-59.
- Jakubowska, D., and Janicka, M. (2017). The role of brassinosteroids in the regulation of the plasma membrane H<sup>+</sup>-ATPase and NADPH oxidase under cadmium stress. *Plant Sci.* 264:37-47.
- Jiao, Y., Sun, L., Song, Y., Wang, L., Liu, L., Zhang, L., Liu, B., Li, N., Miao, C., and Hao, F. (2013). AtrbohD and AtrbohF positively regulate abscisic acid-inhibited primary root growth by affecting Ca<sup>2+</sup> signalling and auxin response of roots in *Arabidopsis*. *J. Exp. Bot.* 64:4183-4192.
- Jimenez-Quesada, M. J., Traverso, J. A., Potocky, M., Zarsky, V. and Alche J. D. (2019). Generation of Superoxide by Oerboh, a NADPH Oxidase Activity During Olive (*Olea Europaea* L.) Pollen Development and Germination." *Front Plant Sci* 10: 1149.
- Jones, M.A., Raymond, M.J., Yang, Z., and Smirnov, N. (2007). NADPH oxidase-dependent reactive oxygen species formation required for root hair growth depends on ROP GTPase. *J. Exp. Bot.* 58:1261-1270.
- Kadota, Y., Sklenar, J., Derbyshire, P., Stransfeld, L., Asai, S., Ntoukakis, V., Jones, J.D., Shirasu,

- 
- K., Menke, F., Jones, A., et al. (2014). Direct regulation of the NADPH oxidase RBOHD by the PRR-associated kinase BIK1 during plant immunity. *Mol. Cell* 54:43-55.
- Kawarazaki, T., Kimura, S., Iizuka, A., Hanamata, S., Nibori, H., Michikawa, M., Imai, A., Abe, M., Kaya, H., and Kuchitsu, K. (2013). A low temperature-inducible protein AtSRC2 enhances the ROS-producing activity of NADPH oxidase AtRbohF. *Biochim. Biophys. Acta.* 1833:2775-2780.
- Kaya, H., Iwano, M., Takeda, S., Kanaoka, M.M., Kimura, S., Abe, M., and Kuchitsu, K. (2015). Apoplastic ROS production upon pollination by RbohH and RbohJ in Arabidopsis. *Plant Signal. Behav.* 10:e989050.
- Kaya, H., Nakajima, R., Iwano, M., Kanaoka, M.M., Kimura, S., Takeda, S., Kawarazaki, T., Senzaki, E., Hamamura, Y., Higashiyama, T., et al. (2014). Ca<sup>2+</sup>-activated reactive oxygen species production by Arabidopsis RbohH and RbohJ is essential for proper pollen tube tip growth. *The Plant cell* 26:1069-1080.
- Kobayashi, M., Ohura, I., Kawakita, K., Yokota, N., Fujiwara, M., Shimamoto, K., Doke, N., and Yoshioka, H. (2007). Calcium-dependent protein kinases regulate the production of reactive oxygen species by potato NADPH oxidase. *The Plant cell* 19:1065-1080.
- Kumar, G.N., Iyer, S., and Knowles, N.R. (2007). Strboh A homologue of NADPH oxidase regulates wound-induced oxidative burst and facilitates wound-healing in potato tubers. *Planta* 227:25-36.
- Kurusu, T., Kuchitsu, K., and Tada, Y. (2015). Plant signaling networks involving Ca<sup>2+</sup> and Rboh/Nox-mediated ROS production under salinity stress. *Front. Plant Sci.* 6:8.
- Lequeu, J., Simon-Plas, F., Fromentin, J., Etienne, P., Petitot, A.S., Blein, J.P., and Suty, L. (2005). Proteasome comprising a beta1 inducible subunit acts as a negative regulator of NADPH oxidase during elicitation of plant defense reactions. *FEBS Lett* 579:4879-4886.
- Li, N., Sun, L., Zhang, L., Song, Y., Hu, P., Li, C., and Hao, F.S. (2015a). AtrbohD and AtrbohF negatively regulate lateral root development by changing the localized accumulation of superoxide in primary roots of Arabidopsis. *Planta* 241:591-602.
- Li, W.Y., Chen, B.X., Chen, Z.J., Gao, Y.T., Chen, Z., and Liu, J. (2017). Reactive oxygen species generated by NADPH oxidases promote radicle protrusion and root elongation during rice seed germination. *Int. J. Mol. Sci.* 18:E110.
- Li, Z., Wang, F., Zhao, Q., Liu, J., and Cheng, F. (2018). Involvement of NADPH oxidase isoforms in the production of O<sub>2</sub><sup>-</sup> manipulated by ABA in the senescing leaves of early-senescence-leaf (*esl*) mutant rice (*Oryza sativa*). *PloS one* 13:e0190161.
- Lightfoot, D., Boettcher, A., Little, A., Shirley, N., and Able, A. (2008). Identification and characterisation of barley (*Hordeum vulgare*) respiratory burst oxidase homologue family members. *Funct. Plant Biol.* 35:347-359.
- Lin, F., Ding, H., Wang, J., Zhang, H., Zhang, A., Zhang, Y., Tan, M., Dong, W., and Jiang, M. (2009a). Positive feedback regulation of maize NADPH oxidase by mitogen-activated protein kinase cascade in abscisic acid signalling. *J. Exp. Bot.* 60:3221-3238.
- Lin, F., Zhang, Y., and Jiang, M.Y. (2009b). Alternative splicing and differential expression of two transcripts of nicotine adenine dinucleotide phosphate oxidase B gene from *Zea mays*. *J. Integr. Plant Biol.* 51:287-298.
- Lin, I.S., Wu, Y.-S., Chen, C.-T., Chen, G.-H., Hwang, S.-G., Jauh, G.-Y., Tzen, J.T.C., and Yang, C.-Y. (2017). AtRBOH I confers submergence tolerance and is involved in auxin-mediated

- 
- signaling pathways under hypoxic stress. *Plant Growth Regul.* 83:277-285.
- Liu, B., Zhao, S., Tan, F., Zhao, H., Wang, D., Si, H., and Chen, Q. (2017). Changes in ROS production and antioxidant capacity during tuber sprouting in potato. *Food Chem.* 237:205-213.
- Liu, H.B., Wang, X.D., Zhang, Y.Y., Dong, J.J., Ma, C., and Chen, W.L. (2015). NADPH oxidase RBOHD contributes to autophagy and hypersensitive cell death during the plant defense response in *Arabidopsis thaliana*. *Biol. Plantarum* 59:570-580.
- Ma, L., Zhang, H., Sun, L., Jiao, Y., Zhang, G., Miao, C., and Hao, F. (2012). NADPH oxidase AtrbohD and AtrbohF function in ROS-dependent regulation of Na<sup>+</sup>/K<sup>+</sup> homeostasis in *Arabidopsis* under salt stress. *J. Exp. Bot.* 63:305-317.
- Marino, D., Andrio, E., Danchin, E.G.J., Oger, E., Gucciardo, S., Lambert, A., Puppo, A., and Pauly, N. (2011). A *Medicago truncatula* NADPH oxidase is involved in symbiotic nodule functioning. *New Phytol.* 189:580-592.
- Miller, G., Schlauch, K., Tam, R., Cortes, D., Torres, M.A., Shulaev, V., Dangl, J.L., and Mittler, R. (2009). The plant NADPH oxidase RBOHD mediates rapid systemic signaling in response to diverse stimuli. *Sci. Signal* 2:ra45.
- Mittler, R., and Blumwald, E. (2015). The roles of ROS and ABA in systemic acquired acclimation. *The Plant cell* 27:64-70.
- Montiel, J., Arthikala, M.K., and Quinto, C. (2013). *Phaseolus vulgaris* RbohB functions in lateral root development. *Plant Signal. Behav.* 8:e22694.
- Montiel, J., Nava, N., Cardenas, L., Sanchez-Lopez, R., Arthikala, M.K., Santana, O., Sanchez, F., and Quinto, C. (2012). A *Phaseolus vulgaris* NADPH oxidase gene is required for root infection by Rhizobia. *Plant Cell Physiol.* 53:1751-1767.
- Morales, J., Kadota, Y., Zipfel, C., Molina, A., and Torres, M.A. (2016). The Arabidopsis NADPH oxidases *RbohD* and *RbohF* display differential expression patterns and contributions during plant immunity. *J. Exp. Bot.* 67:1663-1676.
- Müller, K., Carstens, A.C., Linkies, A., Torres, M.A., and Leubner-Metzger, G. (2009). The NADPH-oxidase *AtrbohB* plays a role in Arabidopsis seed after-ripening. *New Phytol.* 184:885-897.
- Müller, K., Linkies, A., Leubner-Metzger, G., and Kermode, A.R. (2012). Role of a respiratory burst oxidase of *Lepidium sativum* (cress) seedlings in root development and auxin signalling. *J. Exp. Bot.* 63:6325-6334.
- Nestler, J., Liu, S.Z., Wen, T.J., Paschold, A., Marcon, C., Tang, H.M., Li, D.L., Li, L., Meeley, R.B., Sakai, H., et al. (2014). *Roothairless5*, which functions in maize (*Zea mays* L.) root hair initiation and elongation encodes a monocot-specific NADPH oxidase. *Plant J.* 79:729-740.
- Niu, M., Huang, Y., Sun, S., Sun, J., Cao, H., Shabala, S., and Bie, Z. (2018). Root respiratory burst oxidase homologue-dependent H<sub>2</sub>O<sub>2</sub> production confers salt tolerance on a grafted cucumber by controlling Na<sup>+</sup> exclusion and stomatal closure. *J. Exp. Bot.* 69:3465-3476.
- Noirot, E., Der, C., Lherminier, J., Robert, F., Moricova, P., Kieu, K., Leborgne-Castel, N., Simon-Plas, F., and Bouhidel, K. (2014). Dynamic changes in the subcellular distribution of the tobacco ROS-producing enzyme RBOHD in response to the oomycete elicitor cryptogein. *J. Exp. Bot.* 65:5011-5022.
- Nordzieke, D. E., T. R. Fernandes, M. El Ghalid, D. Turra, and A. Di Pietro (2019). Nadph Oxidase Regulates Chemotropic Growth of the Fungal Pathogen *Fusarium Oxysporum* Towards the



- 
- Host Plant. *New Phytol* 224, no. 4: 1600-12.
- Pogany, M., von Rad, U., Grun, S., Dongo, A., Pintye, A., Simoneau, P., Bahnweg, G., Kiss, L., Barna, B., and Durner, J. (2009). Dual roles of reactive oxygen species and NADPH oxidase RBOHD in an *Arabidopsis-Alternaria* pathosystem. *Plant Physiol.* 151:1459-1475.
- Potocky, M., Jones, M.A., Bezvoda, R., Smirnov, N., and Zarsky, V. (2007). Reactive oxygen species produced by NADPH oxidase are involved in pollen tube growth. *New Phytol.* 174:742-751.
- Potocky, M., Pejchar, P., Gutkowska, M., Jimenez-Quesada, M.J., Potocka, A., Alche Jde, D., Kost, B., and Zarsky, V. (2012). NADPH oxidase activity in pollen tubes is affected by calcium ions, signaling phospholipids and Rac/Rop GTPases. *J. Plant Physiol.* 169:1654-1663.
- Rohollahi, I., Khoshkholghsima, N., Nagano, H., Hoshino, Y., and Yamada, T. (2018). *Respiratory burst oxidase-D* expression and biochemical responses in *Festuca arundinacea* under drought stress. *Crop Sci.* 58.
- Sagi, M., Davydov, O., Orazova, S., Yesbergenova, Z., Ophir, R., Stratmann, J.W., and Fluhr, R. (2004). Plant respiratory burst oxidase homologs impinge on wound responsiveness and development in *Lycopersicon esculentum*. *The Plant cell* 16:616-628.
- Sagi, M., and Fluhr, R. (2006). Production of reactive oxygen species by plant NADPH oxidases. *Plant Physiol.* 141:336-340.
- Si, Y., Dane, F., Rashotte, A., Kang, K., and Singh, N.K. (2010). Cloning and expression analysis of the *Ccrboh* gene encoding respiratory burst oxidase in *Citrullus colocynthis* and grafting onto *Citrullus lanatus* (watermelon). *J. Exp. Bot.* 61:1635-1642.
- Trujillo, M., Altschmied, L., Schweizer, P., Kogel, K.H., and Huckelhoven, R. (2006). *Respiratory burst oxidase homologue A* of barley contributes to penetration by the powdery mildew fungus *Blumeria graminis* f. sp. *hordei*. *J. Exp. Bot.* 57:3781-3791.
- Wang, X., Zhang, M.M., Wang, Y.J., Gao, Y.T., Li, R., Wang, G.F., Li, W.Q., Liu, W.T., and Chen, K.M. (2016). The plasma membrane NADPH oxidase OsRbohA plays a crucial role in developmental regulation and drought-stress response in rice. *Physiol. Plant.* 156:421-443.
- Wong, H.L., Pinontoan, R., Hayashi, K., Tabata, R., Yaeno, T., Hasegawa, K., Kojima, C., Yoshioka, H., Iba, K., Kawasaki, T., et al. (2007). Regulation of rice NADPH oxidase by binding of Rac GTPase to its N-terminal extension. *The Plant cell* 19:4022-4034.
- Wu, J., Wang, L., Wunsche, H., and Baldwin, I.T. (2013). *Narboh D*, a respiratory burst oxidase homolog in *Nicotiana attenuata*, is required for late defense responses after herbivore attack. *J. Integr. Plant Biol.* 55:187-198.
- Xia, X.J., Wang, Y.J., Zhou, Y.H., Tao, Y., Mao, W.H., Shi, K., Asami, T., Chen, Z., and Yu, J.Q. (2009). Reactive oxygen species are involved in brassinosteroid-induced stress tolerance in cucumber. *Plant Physiol.* 150:801-814.
- Xie, H.T., Wan, Z.Y., Li, S., and Zhang, Y. (2014). Spatiotemporal production of reactive oxygen species by NADPH oxidase is critical for tapetal programmed cell death and pollen development in *Arabidopsis*. *The Plant cell* 26:2007-2023.
- Yamamizo, C., Doke, N., Yoshioka, H., and Kawakita, K. (2007). Involvement of mitogen-activated protein kinase in the induction of *StrbohC* and *StrbohD* genes in response to pathogen signals in potato. *J. Gen. Plant Pathol.* 73:304-313.
- Yamauchi, T., Yoshioka, M., Fukazawa, A., Mori, H., Nishizawa, N.K., Tsutsumi, N., Yoshioka, H., and Nakazono, M. (2017). An NADPH oxidase RBOH functions in rice roots during

- 
- Lysigenous Aerenchyma* formation under oxygen-deficient conditions. *The Plant cell* 29:775-790.
- Yang, C.Y., and Hong, C.P. (2015). The NADPH oxidase Rboh D is involved in primary hypoxia signalling and modulates expression of hypoxia-inducible genes under hypoxic stress. *Environ. Exp. Bot.* 115:63-72.
- Yoshie, Y., Goto, K., Takai, R., Lwano, M., Takayama, S., Lsogai, A., and Che, F. (2005). Function of the rice gp91<sup>phox</sup> homologs *OsrbohA* and *OsrbohE* genes in ROS-dependent plant immune responses. *Plant Biotechnol.* 22:127-135.
- Yoshioka, H., Adachi, H., Nakano, T., Miyagawa, N., Asai, S., Ishihama, N., and Yoshioka, M. (2016). Hierarchical regulation of NADPH oxidase by protein kinases in plant immunity. *Physiol. Mol. Plant P.* 95:20-26.
- Yoshioka, H., Numata, N., Nakajima, K., Katou, S., Kawakita, K., Rowland, O., Jones, J.D.G., and Doke, N. (2003). *Nicotiana benthamiana* gp91<sup>phox</sup> homologs *NbrbohA* and *NbrbohB* participate in H<sub>2</sub>O<sub>2</sub> accumulation and resistance to *Phytophthora infestans*. *The Plant cell* 15:706-718.
- Zhang, Y., Li, Y., He, Y., Hu, W., Zhang, Y., Wang, X., and Tang, H. (2018). Identification of NADPH oxidase family members associated with cold stress in strawberry. *FEBS Open Bio.* 8:593-605.
- Zhang, Z. B., Zhao, Y. L., Feng, X.B., Luo, Z. Y., Kong, S. W., Zhang, C., Gong, A. D., Yuan, H. Y., Cheng, L., and Wang, X. N. (2019). Genomic, molecular evolution, and expression analysis of NOX genes in soybean (*Glycine max*). *Genomics*, 111: 619-628.
